# Supplementary material for: Tuning linkage isomerism and magnetic properties of bi- and tri-metallic cage silsesquioxanes by cation and solvent effects
Source: Royal Society of Chemistry journal article supplement (doi:10.1039/c7dt02017a), 2017-01-01
Supplement: c7dt02017a1.pdf [file c7dt02017a1.pdf]

ESI for

## Bi- and Tri-metallic Cage Silsesquioxanes: Features of Supramolecular Assembling and Magnetic Properties

by

*Alexey N. Bilyachenko, Alexander A. Korlyukov, Anna V. Vologzhanina, Victor N. Khrustalev, Alena N. Kulakova, Jérôme Long, Joulia Larionova, Yannick Guari, Marina S. Dronova, † Juliana S. Tsareva, Pavel V. Dorovatovskii, Elena S. Shubina, † Mikhail M. Levitsky †*

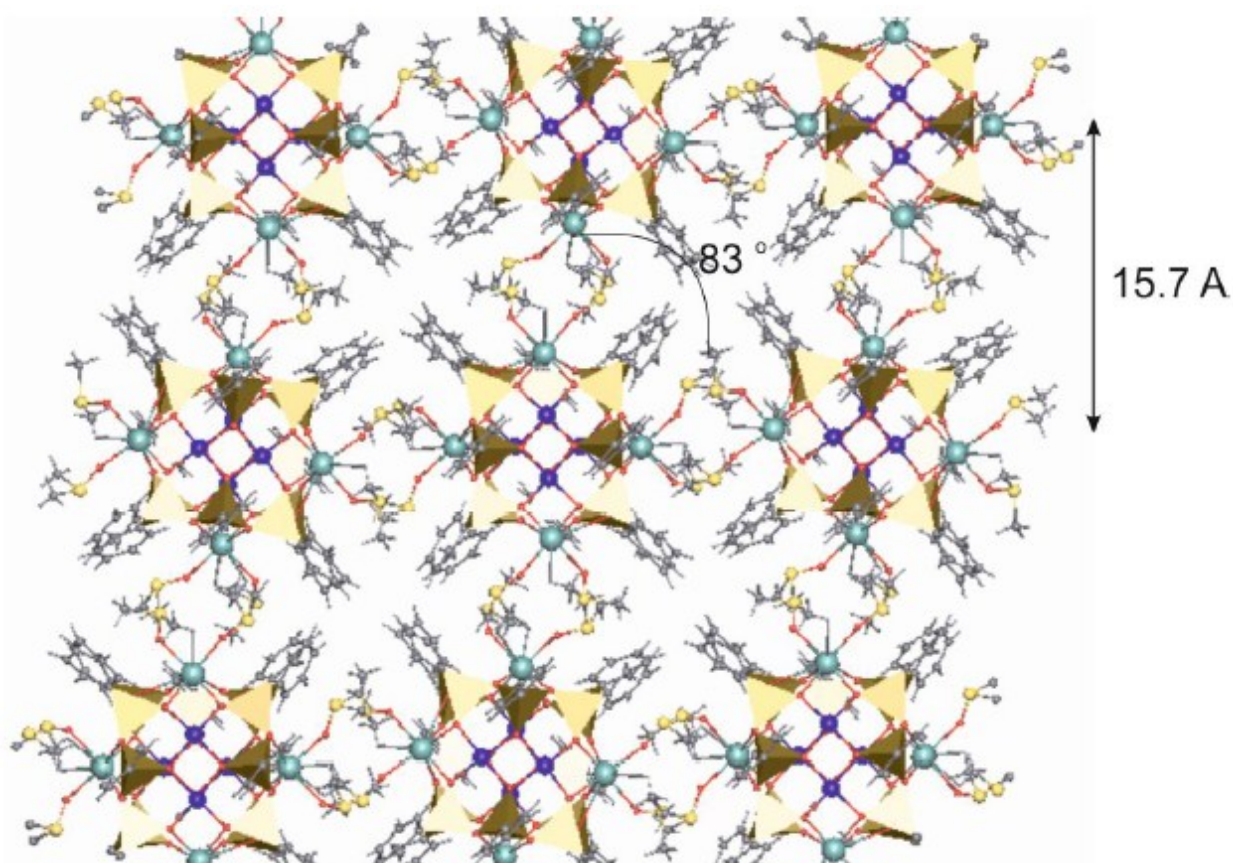

**Figure S1.** Packing via C-H...Na interactions between sodium atoms and DMSO molecules of neighboring cages in **2**.

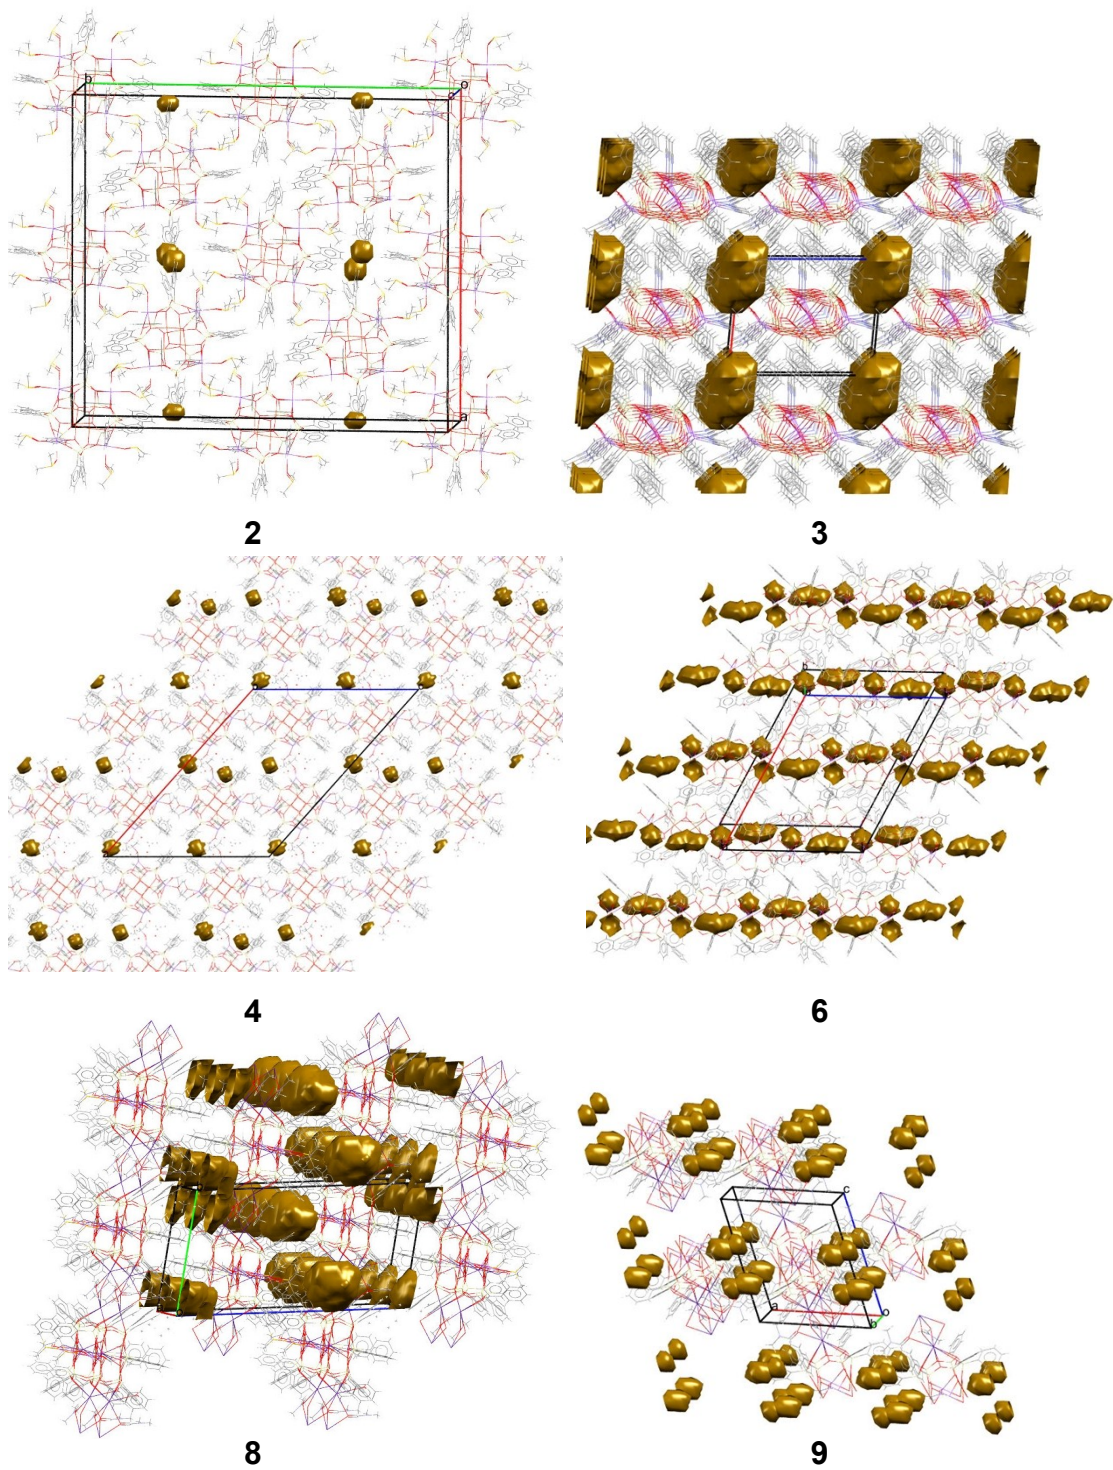

**Figure S2.** Visualization of voids in crystals 2-4, 6, 8, 9.
